# Supplementary material
Source: Research Square preprint supplement (doi:10.21203/rs.3.rs-8876140/v1)
Supplement: Supplementary file 1 [file 5c6ea6933ccc097d813a1a88.docx]

**Spatial and seasonal changes in levels of perfluoroalkyl acids (PFAAs) in surface water and sediment from a typical paper-making area in Vietnam**

Thi Vi Phung1,2, Thuy Ngoc Nguyen3, Thanh Dam Nguyen3, Dinh Quang Phan4,
Huu Tuyen Le3, Hung Viet Pham1,3, Hong Anh Duong1,3*

1Key Laboratory of Analytical Technology for Environmental Quality and Food Safety Control (KLATEFOS), VNU University of Science (VNU-HUS), Vietnam National University, Hanoi (VNU), 334 Nguyen Trai Street, Thanh Xuan, Hanoi, Vietnam

2Falcuty of Environmental Sciences, VNU University of Science (VNU-HUS), Vietnam National University, Hanoi (VNU), 334 Nguyen Trai Street, Thanh Xuan, Hanoi, Vietnam

3Research Centre of Environmental Technology for Sustainable Development (CETASD), Falcuty of Chemistry, VNU University of Science (VNU-HUS), Vietnam National University, Hanoi (VNU), 334 Nguyen Trai Street, Thanh Xuan, Hanoi, Vietnam

4Vietnam National Institute of Occupational Safety and Health, 99 Tran Quoc Toan, Hoan Kiem, Hanoi, Vietnam

*Corresponding author: [duonghonganh@hus.edu.vn](mailto:duonghonganh@hus.edu.vn)

Table S1: MRM parameter of analytes

Table S2: Concentrations of PFAA compounds in surface water (ng/L)

Table S3: Concentrations of PFAA compounds in sediment (ng/g)

Table S4: LC50, EC50, NOEC, LOEC and mean concentraions of PFAAs used for ecological risk calculation

**Table S1.** MRM parameter of analytes

| **No** | **Compound** | **Formula** | **Precusor ion m/z** | **Product ion m/z** | **Q1 Pre Bias (V)** | **CE (V)** | **Q3 Pre Bias (V)** | **Retention time (s)** |
| --- | --- | --- | --- | --- | --- | --- | --- | --- |
| 1 | PFBA | F3C(CF2)2CO2H | 212.85 | 169.05 | 22 | 10 | 28 | 2.98 |
| 18.9 | 22 | 42 | 16 |
| 2 | PFPeA | F3C(CF2)3CO2H | 262.85 | 219.1 | 27 | 8 | 19 | 6.52 |
| 19.2 | 27 | 45 | 18 |
| 3 | PFHxA | F3C(CF2)4CO2H | 312.8 | 269 | 22 | 9 | 25 | 9.27 |
| 118.95 | 22 | 21 | 18 |
| 4 | PFHpA | F3C(CF2)5CO2H | 362.8 | 319 | 25 | 9 | 30 | 11.15 |
| 169.15 | 25 | 18 | 29 |
| 5 | PFOA | F3C(CF2)6CO2H | 412.8 | 368.95 | 20 | 10 | 22 | 12.57 |
| 169.05 | 20 | 19 | 28 |
| 6 | PFNA | F3C(CF2)7CO2H | 462.8 | 418.95 | 22 | 10 | 26 | 13.73 |
| 219.05 | 22 | 17 | 20 |
| 7 | PFDA | F3C(CF2)8CO2H | 512.85 | 469.2 | 24 | 11 | 30 | 14.70 |
| 219.1 | 24 | 19 | 12 |
| 8 | PFUnDA | F3C(CF2)9CO2H | 562.8 | 518.95 | 40 | 12 | 34 | 15.53 |
| 269.1 | 40 | 17 | 26 |
| 9 | PFDoDA | F3C(CF2)10CO2H | 612.8 | 568.95 | 22 | 12 | 38 | 16.24 |
| 318.75 | 22 | 20 | 29 |
| 10 | PFTrDA | F3C(CF2)11CO2H | 662.8 | 618.95 | 32 | 13 | 40 | 16.87 |
| 169.25 | 32 | 31 | 29 |
| 11 | PFTeDA | F3C(CF2)12CO2H | 712.8 | 669 | 34 | 13 | 30 | 17.41 |
| 169.3 | 34 | 36 | 26 |
| 12 | PFHxDA | F3C(CF2)14CO2H | 812.85 | 769 | 40 | 15 | 36 | 18.29 |
| 13 | PFODA | F3C(CF2)16CO2H | 912.8 | 868.6 | 24 | 19 | 38 | 18.98 |
| 169.15 | 24 | 45 | 28 |
| 14 | PFBS | F3C(CF2)3SO3- | 298.85 | 80.05 | 20 | 40 | 29 | 7.17 |
| 99.05 | 20 | 35 | 15 |
| 15 | PFHxS | F3C(CF2)5SO3- | 398.8 | 79.95 | 27 | 46 | 28 | 11.27 |
| 98.95 | 27 | 35 | 16 |
| 16 | PFOS | F3C(CF2)7SO3- | 498.85 | 80.15 | 24 | 50 | 28 | 13.73 |
| 99.05 | 24 | 43 | 15 |
| 17 | PFDS | F3C(CF2)9SO3- | 598.85 | 79.9 | 30 | 50 | 29 | 15.49 |
| 98.85 | 30 | 51 | 13 |

**Table S2:** Concentrations of PFAA compounds in surface water (ng/L)

**Dry season:**

| STT | Hợp chất | PK.SW.01 | PK.SW.02 | PK.SW.03 | PK.SW.04 | PK.SW.05 | PK.SW.06 | PK.SW.07 | PK.SW.08 | PK.SW.09 | PK.SW.10 | PK.SW.11 | PK.SW.12 | PK.SW.13 | PK.SW.14 | PK.SW.15 | PK.SW.16 | PK.SW.17 | PK.SW.18 | PK.SW.19 | PK.SW.20 |
| --- | --- | --- | --- | --- | --- | --- | --- | --- | --- | --- | --- | --- | --- | --- | --- | --- | --- | --- | --- | --- | --- |
| 1 | PFHxA | 0.57 | 0.45 | 0.66 | 0.50 | 2.24 | 0.55 | 1.52 | 4.27 | 1.80 | 5.38 | 4.97 | 15.32 | 5.77 | 1.93 | 3.03 | 6.73 | 7.85 | 6.49 | 5.90 | 15.93 |
| 2 | PFHpA | 0.18 | 0.21 | 0.20 | 0.28 | 0.96 | 0.23 | 0.45 | 0.93 | 0.52 | 1.08 | 1.32 | 1.86 | 0.76 | 0.22 | < MQL | 0.13 | 0.14 | 0.55 | < MQL | 0.10 |
| 3 | PFOA | 0.53 | 0.52 | 0.56 | 0.62 | 2.48 | 0.50 | 2.82 | 5.12 | 2.93 | 6.77 | 11.15 | 16.25 | 10.31 | 4.50 | 0.24 | 6.62 | 5.58 | 4.98 | 1.99 | 3.48 |
| 4 | PFNA | 0.41 | 0.33 | 0.28 | 0.39 | 0.84 | 0.40 | 0.59 | 1.31 | 0.69 | 1.71 | 1.97 | 3.32 | 1.98 | 1.78 | 0.81 | 1.62 | 1.58 | 1.78 | 0.14 | 2.12 |
| 5 | PFDA | < MQL | < MQL | < MQL | < MQL | < MQL | < MQL | < MQL | < MQL | < MQL | < MQL | < MQL | < MQL | < MQL | < MQL | < MQL | < MQL | < MQL | < MQL | < MQL | < MQL |
| 6 | PFUnDA | < MQL | < MQL | < MQL | < MQL | < MQL | < MQL | < MQL | < MQL | < MQL | < MQL | < MQL | < MQL | < MQL | < MQL | 0.77 | < MQL | < MQL | < MQL | 0.53 | < MQL |
| 7 | PFDoDA | < MQL | < MQL | < MQL | < MQL | < MQL | < MQL | 0.23 | < MQL | < MQL | < MQL | < MQL | 0.36 | 0.28 | < MQL | < MQL | 0.41 | < MQL | < MQL | < MQL | < MQL |
| 8 | PFTrDA | < MQL | < MQL | < MQL | < MQL | < MQL | < MQL | < MQL | < MQL | < MQL | < MQL | < MQL | < MQL | < MQL | < MQL | < MQL | < MQL | < MQL | < MQL | < MQL | < MQL |
| 9 | PFTeDA | < MQL | < MQL | < MQL | < MQL | < MQL | < MQL | < MQL | < MQL | < MQL | < MQL | < MQL | < MQL | < MQL | < MQL | < MQL | < MQL | < MQL | < MQL | 0.66 | 0.39 |
| 10 | PFHxS | < MQL | < MQL | 0.91 | < MQL | 1.46 | 1.03 | 1.87 | 3.03 | 1.99 | 3.15 | 6.06 | 5.93 | 6.16 | 3.58 | 2.71 | 6.30 | 6.05 | 4.65 | 3.20 | 4.06 |
| 11 | PFOS | 0.81 | 0.81 | 0.79 | 0.99 | 1.44 | 1.06 | 1.64 | 2.11 | 1.70 | 2.18 | 3.27 | 3.51 | 2.78 | 3.19 | 2.19 | 2.64 | 3.64 | 2.54 | 2.15 | 1.92 |
| 12 | PFDS | < MQL | < MQL | < MQL | < MQL | < MQL | 0.52 | < MQL | < MQL | < MQL | < MQL | < MQL | 2.46 | < MQL | < MQL | 2.46 | 35.57 | 63.54 | 20.32 | 7.61 | 1.88 |
|  | **Sum PFAAs** | **2.49** | **2.32** | **3.41** | **2.78** | **9.42** | **4.28** | **9.13** | **16.77** | **9.63** | **20.26** | **28.73** | **49.02** | **28.04** | **15.19** | **12.20** | **60.02** | **88.38** | **41.32** | **22.18** | **29.88** |
|  | **PFCAs** | **1.69** | **1.51** | **1.71** | **1.80** | **6.52** | **1.68** | **5.62** | **11.63** | **5.93** | **14.94** | **19.40** | **37.12** | **19.10** | **8.42** | **4.84** | **15.51** | **15.14** | **13.81** | **9.22** | **22.02** |
|  | **PFSAs** | **0.81** | **0.81** | **1.70** | **0.99** | **2.90** | **2.61** | **3.51** | **5.14** | **3.70** | **5.32** | **9.33** | **11.90** | **8.94** | **6.77** | **7.36** | **44.51** | **73.23** | **27.51** | **12.96** | **7.86** |

**Rainy season:**

| STT | Hợp chất | PK.SW.01 | PK.SW.02 | PK.SW.03 | PK.SW.04 | PK.SW.05 | PK.SW.06 | PK.SW.07 | PK.SW.08 | PK.SW.09 | PK.SW.10 | PK.SW.11 | PK.SW.12 | PK.SW.13 | PK.SW.14 | PK.SW.15 | PK.SW.16 | PK.SW.17 | PK.SW.18 | PK.SW.19 | PK.SW.20 |
| --- | --- | --- | --- | --- | --- | --- | --- | --- | --- | --- | --- | --- | --- | --- | --- | --- | --- | --- | --- | --- | --- |
| 1 | PFHxA | 0.47 | 0.39 | < MQL | 1.91 | < MQL | < MQL | 3.00 | 2.07 | 1.74 | 1.97 | 2.04 | 6.35 | 1.96 | 1.59 | 1.74 | 7.94 | 9.07 | 9.84 | 5.14 | 12.23 |
| 2 | PFHpA | < MQL | 0.70 | < MQL | 1.09 | < MQL | < MQL | 1.14 | 1.21 | 1.10 | 0.76 | 1.12 | 3.10 | 0.96 | 0.91 | 0.84 | 2.72 | 4.81 | 4.09 | 3.28 | 4.01 |
| 3 | PFOA | < MQL | 0.36 | 0.60 | 2.52 | < MQL | < MQL | 2.32 | 2.64 | 2.41 | 2.27 | 2.38 | 5.37 | 2.66 | 1.33 | 1.72 | 8.21 | 9.28 | 10.17 | 10.23 | 13.34 |
| 4 | PFNA | < MQL | < MQL | < MQL | < MQL | < MQL | < MQL | < MQL | < MQL | < MQL | < MQL | < MQL | < MQL | < MQL | < MQL | < MQL | < MQL | < MQL | 1.91 | 3.34 | 0.97 |
| 5 | PFDA | < MQL | < MQL | < MQL | 0.61 | < MQL | < MQL | < MQL | < MQL | < MQL | < MQL | < MQL | 2.76 | < MQL | < MQL | < MQL | 0.70 | 0.91 | 1.09 | < MQL | 1.28 |
| 6 | PFUnDA | < MQL | < MQL | < MQL | < MQL | < MQL | < MQL | < MQL | < MQL | < MQL | < MQL | < MQL | < MQL | < MQL | < MQL | < MQL | < MQL | < MQL | < MQL | 0.94 | 2.07 |
| 7 | PFDoDA | < MQL | < MQL | < MQL | < MQL | < MQL | < MQL | < MQL | < MQL | < MQL | < MQL | < MQL | 2.45 | < MQL | < MQL | < MQL | 4.00 | 3.69 | 1.29 | 2.57 | 2.79 |
| 8 | PFTrDA | < MQL | < MQL | < MQL | < MQL | < MQL | < MQL | < MQL | < MQL | < MQL | < MQL | < MQL | 0.62 | < MQL | < MQL | < MQL | < MQL | < MQL | < MQL | < MQL | < MQL |
| 9 | PFTeDA | < MQL | < MQL | < MQL | < MQL | < MQL | < MQL | < MQL | < MQL | < MQL | < MQL | < MQL | < MQL | < MQL | < MQL | < MQL | 1.07 | 1.62 | < MQL | 1.77 | 2.97 |
| 10 | PFHxS | 0.36 | < MQL | < MQL | 0.69 | < MQL | < MQL | 1.07 | 0.34 | 0.59 | 0.54 | 0.58 | < MQL | < MQL | 0.50 | 0.38 | 11.61 | 6.42 | 12.08 | 12.96 | 7.28 |
| 11 | PFOS | 0.60 | 0.35 | 0.40 | 2.43 | < MQL | < MQL | 1.60 | 1.55 | 2.81 | 2.42 | 3.02 | 1.51 | 2.45 | 2.40 | 2.17 | 1.10 | < MQL | 3.10 | 1.85 | 3.21 |
| 12 | PFDS | < MQL | < MQL | < MQL | < MQL | < MQL | < MQL | < MQL | < MQL | < MQL | < MQL | < MQL | < MQL | < MQL | < MQL | < MQL | < MQL | 0.62 | < MQL | < MQL | < MQL |
|  | **Sum PFAAs** | **1.43** | **1.79** | **0.99** | **9.24** | **< MQL** | **< MQL** | **9.12** | **7.82** | **8.66** | **7.97** | **9.14** | **22.15** | **8.04** | **6.72** | **6.84** | **37.33** | **36.40** | **43.55** | **42.05** | **50.13** |
|  | **PFCAs** | **0.47** | **1.45** | **0.60** | **6.13** | **< MQL** | **< MQL** | **6.45** | **5.92** | **5.26** | **5.00** | **5.54** | **20.64** | **5.58** | **3.83** | **4.29** | **24.63** | **29.37** | **28.38** | **27.24** | **39.65** |
|  | **PFSAs** | **0.96** | **0.35** | **0.40** | **3.12** | **< MQL** | **< MQL** | **2.67** | **1.90** | **3.41** | **2.97** | **3.60** | **1.51** | **2.45** | **2.89** | **2.55** | **12.70** | **7.04** | **15.18** | **14.81** | **10.49** |

**Note:** Samples PK.SW.01–PK.SW.06 were collected from the Cau River; PK.SW.07–PK.SW.15 were collected from the Ngu Huyen Khe River; and PK.SW.16–PK.SW.20 were collected from drainage channels.

**Table S3:** Concentrations of PFAA compounds in sediment (ng/g)

**Dry season:**

| **TT** | **Hợp chất** | **PK.S.01** | **PK.S.02** | **PK.S.03** | **PK.S.04** | **PK.S.05** | **PK.S.06** | **PK.S.07** | **PK.S.08** | **PK.S.09** | **PK.S.10** | **PK.S.11** | **PK.S.12** | **PK.S.13** | **PK.S.14** | **PK.S.15** | **PK.S.16** | **PK.S.17** | **PK.S.18** | **PK.S.19** | **PK.S.20** |
| --- | --- | --- | --- | --- | --- | --- | --- | --- | --- | --- | --- | --- | --- | --- | --- | --- | --- | --- | --- | --- | --- |
| 1 | PFHxA | < MQL | < MQL | < MQL | 0.01 | < MQL | 0.03 | < MQL | < MQL | < MQL | < MQL | < MQL | < MQL | < MQL | 0.24 | 0.05 | < MQL | < MQL | < MQL | < MQL | < MQL |
| 2 | PFHpA | < MQL | < MQL | < MQL | < MQL | < MQL | < MQL | < MQL | < MQL | < MQL | < MQL | 0.03 | < MQL | < MQL | < MQL | < MQL | < MQL | < MQL | < MQL | < MQL | < MQL |
| 3 | PFOA | < MQL | < MQL | < MQL | < MQL | < MQL | < MQL | < MQL | < MQL | < MQL | < MQL | < MQL | < MQL | < MQL | 0.04 | < MQL | < MQL | < MQL | < MQL | < MQL | < MQL |
| 4 | PFNA | < MQL | < MQL | < MQL | < MQL | < MQL | < MQL | < MQL | < MQL | < MQL | < MQL | < MQL | < MQL | < MQL | < MQL | < MQL | < MQL | < MQL | < MQL | < MQL | < MQL |
| 5 | PFDA | 0.03 | 0.03 | < MQL | < MQL | < MQL | < MQL | < MQL | 0.17 | 0.03 | 0.08 | 0.08 | < MQL | 0.04 | < MQL | 0.28 | 0.03 | 0.26 | 0.04 | 0.03 | 0.07 |
| 6 | PFUnDA | < MQL | < MQL | < MQL | < MQL | < MQL | < MQL | < MQL | 0.21 | < MQL | < MQL | 0.27 | < MQL | < MQL | < MQL | 0.18 | < MQL | 0.23 | < MQL | 0.06 | 0.11 |
| 7 | PFDoDA | < MQL | < MQL | < MQL | < MQL | < MQL | < MQL | < MQL | < MQL | < MQL | < MQL | 0.41 | < MQL | < MQL | < MQL | 0.13 | < MQL | 0.11 | 0.18 | < MQL | < MQL |
| 8 | PFTrDA | 0.47 | < MQL | < MQL | 0.14 | < MQL | 0.21 | 0.17 | 0.32 | < MQL | 0.32 | 1.52 | 0.29 | 0.14 | 0.12 | 0.18 | 0.36 | 0.56 | 0.21 | 0.25 | 0.49 |
| 9 | PFTeDA | 0.53 | < MQL | 0.43 | < MQL | 0.13 | 0.32 | 0.20 | 2.41 | 0.39 | 2.92 | 2.76 | 0.12 | 0.24 | 0.33 | 1.13 | 0.12 | 0.97 | 0.54 | 1.12 | 0.70 |
| 10 | PFHxS | < MQL | < MQL | < MQL | 0.14 | < MQL | < MQL | 0.13 | 0.38 | 0.15 | 0.33 | 0.33 | 0.15 | 0.23 | < MQL | 0.56 | < MQL | 0.24 | 0.16 | 0.20 | 0.23 |
| 11 | PFOS | < MQL | < MQL | < MQL | < MQL | < MQL | < MQL | < MQL | 0.36 | < MQL | < MQL | < MQL | < MQL | 0.18 | < MQL | 0.20 | < MQL | 0.33 | 0.19 | 0.27 | < MQL |
| 12 | PFDS | < MQL | < MQL | < MQL | 0.14 | < MQL | 0.15 | 0.14 | 0.43 | 0.14 | 0.33 | 0.93 | 0.20 | 0.16 | < MQL | 0.53 | 0.24 | 0.29 | 0.41 | 0.42 | 0.70 |
|  | **Sum PFAAs** | **1.03** | **0.03** | **0.43** | **0.42** | **0.13** | **0.71** | **0.64** | **4.29** | **0.71** | **3.97** | **6.32** | **0.76** | **0.99** | **0.73** | **3.25** | **0.74** | **3.00** | **1.74** | **2.34** | **2.30** |
|  | **Sum PFCAs** | **1.03** | **0.03** | **0.43** | **0.15** | **0.13** | **0.57** | **0.37** | **3.11** | **0.42** | **3.31** | **5.06** | **0.41** | **0.42** | **0.73** | **1.95** | **0.50** | **2.14** | **0.97** | **1.46** | **1.38** |
|  | **Sum PFSAs** | **< MQL** | **< MQL** | **< MQL** | **0.28** | **< MQL** | **0.15** | **0.27** | **1.18** | **0.29** | **0.66** | **1.26** | **0.35** | **0.57** | **< MQL** | **1.30** | **0.24** | **0.87** | **0.76** | **0.88** | **0.92** |

**Rainy season:**

| **TT** | **Compound** | **PK.S.16** | **PK.S.17** | **PK.S.18** | **PK.S.19** | **PK.S.20** |
| --- | --- | --- | --- | --- | --- | --- |
| 1 | PFHxA | < MQL | < MQL | < MQL | < MQL | < MQL |
| 2 | PFHpA | < MQL | < MQL | < MQL | < MQL | < MQL |
| 3 | PFOA | < MQL | < MQL | 0.255 | < MQL | < MQL |
| 4 | PFNA | < MQL | < MQL | < MQL | < MQL | < MQL |
| 5 | PFDA | < MQL | < MQL | < MQL | 0.17 | < MQL |
| 6 | PFUnDA | < MQL | 2.85 | 0.44 | < MQL | < MQL |
| 7 | PFDoDA | 2.74 | 3.42 | 2.31 | 8.81 | 2.22 |
| 8 | PFTeDA | 0.88 | 1.10 | 0.24 | 1.03 | 0.28 |
| 9 | PFHxS | < MQL | 0.21 | 0.07 | < MQL | < MQL |
| 10 | PFOS | 0.09 | 0.542 | 0.62 | 1.81 | 0.24 |
|  | **Sum PFAAs** | **3.70** | **8.11** | **3.94** | **11.83** | **2.74** |
|  | **Sum PFCAs** | **3.61** | **7.37** | **3.25** | **10.01** | **2.50** |
|  | **Sum PFSAs** | **0.09** | **0.75** | **0.69** | **1.81** | **0.24** |

**Table S4:** LC50, EC50, NOEC, LOEC and mean concentraions of PFAAs used for ecological risk calculation

| **Compound** | **Species** | **Aquatic organism** | **End point** | **Effect concentration (mg/L)** | **AF** | **PNEC (ng/L)** | **Mean (ng/L)** | | | | | | **References** |
| --- | --- | --- | --- | --- | --- | --- | --- | --- | --- | --- | --- | --- | --- |
| **Cau River** | | **Ngu Huyen Khe River** | | **Drainage channel** | |
| **Dry** | **Rainy** | **Dry** | **Rainy** | **Dry** | **Rainy** |
| PFHxA | *Daphnia magna* | crustacean | EC50 | 1048 | 1000 | 1048000 | 0.83 | 0.63 | 5.12 | 2.01 | 7.66 | 8.43 | Barmentlo et al. 2015 |
| *Brachionus calyciflorus* | rotifer | LC50 | 140 | 1000 | 140000 | 0.83 | 0.63 | 5.12 | 2.01 | 7.66 | 8.43 | Wang et al. 2014 |
| PFHpA | *Daphnia magna* | crustacean | LC50 | 1000 | 1000 | 1000000 | 0.34 | 0.30 | 0.89 | 1.00 | 0.15 | 3.67 | Boudreau 2002 |
| PFOA | *Brachionus calyciflorus* | rotifer | NOEC | 0.125 | 100 | 1250 | 0.87 | 0.64 | 7.48 | 2.22 | 3.81 | 9.43 | Zhang et al. 2013 |
| *Chironomus plumosus* | midge | NOEC | 0.0098 | 100 | 98 | 0.87 | 0.64 | 7.48 | 2.22 | 3.81 | 9.43 | Zhai et al. 2016 |
| *Chydorus sphaericus* | crustacean | EC50 | 176 | 100 | 176000 | 0.87 | 0.64 | 7.48 | 2.22 | 3.81 | 9.43 | Ding et al. 2012 |
| *Cipangopaludina cathayensis* | mollusk | LC50 | 740 | 1000 | 740000 | 0.87 | 0.64 | 7.48 | 2.22 | 3.81 | 9.43 | Yang et al. 2014 |
| *Cyclops sp.* | crustacean | LOEC | 70 | 100 | 700000 | 0.87 | 0.64 | 7.48 | 2.22 | 3.81 | 9.43 | Sanderson et al. 2003 |
| *Limnodrilus hoffmeisteri* | worms | LC50 | 568 | 1000 | 568000 | 0.87 | 0.64 | 7.48 | 2.22 | 3.81 | 9.43 | Yang et al. 2014 |
| *Macrobrachium nipponense* | crustacean, shrimp | LC50 | 367 | 1000 | 367000 | 0.87 | 0.64 | 7.48 | 2.22 | 3.81 | 9.43 | Yang et al. 2014 |
| *Moina macrocopa* | crustacean | EC50 | 199 | 1000 | 199000 | 0.87 | 0.64 | 7.48 | 2.22 | 3.81 | 9.43 | Ji et al. 2008 |
| *Moina micrura* | crustacean | LC50 | 0.4747 | 1000 | 474.70 | 0.87 | 0.64 | 7.48 | 2.22 | 3.81 | 9.43 | Muhammad et al. 2023 |
| *Neocaridina denticulata* | crustacean, shrimp | LC50 | 564 | 1000 | 564000 | 0.87 | 0.64 | 7.48 | 2.22 | 3.81 | 9.43 | Li 2009 |
| *Cyprinus carpio* | fish | LOEC | 2 | 100 | 20000 | 0.87 | 0.64 | 7.48 | 2.22 | 3.81 | 9.43 | Manera et al. 2017 |
| PFNA | *Daphnia magna* | crustacean | NOEC | 0.04 | 100 | 400 | 1.20 | 0.00 | 1.67 | 0.11 | 1.34 | 1.04 | Lu et al. 2015 |
| *Chironomus plumosus* | midge | NOEC | 0.0096 | 100 | 96 | 1.20 | 0.00 | 1.67 | 0.11 | 1.34 | 1.04 | Zhai et al. 2016 |
| *Chydorus sphaericus* | crustacean | EC50 | 27.80 | 1000 | 27800 | 1.20 | 0.00 | 1.67 | 0.11 | 1.34 | 1.04 | Ding et al. 2012 |
| *Perna viridis* | mussel | EC50 | 0.195 | 1000 | 195 | 1.20 | 0.00 | 1.67 | 0.11 | 1.34 | 1.04 | Ding et al. 2012 |
| PFDA | *Daphnia magna* | crustacean | NOEC | 77.10 | 100 | 771000 | 0.00 | 0.21 | 0.00 | 0.21 | 0.00 | 1.12 | Ding et al. 2012 |
| *Chironomus plumosus* | midge | NOEC | 0.0097 | 100 | 97 | 0.00 | 0.21 | 0.00 | 0.21 | 0.00 | 1.12 | Zhai et al. 2016 |
| *Chydorus sphaericus* | crustacean | NOEC | 41 | 1000 | 41000 | 0.00 | 0.21 | 0.00 | 0.21 | 0.00 | 1.12 | Ding et al. 2012 |
| PFUnDA | *Daphnia magna* | crustacean | NOEC | 56 | 100 | 560000 | 0.00 | 0.07 | 0.12 | 0.05 | 0.25 | 0.50 | Ding et al. 2012 |
| *Chironomus plumosus* | midge | NOEC | 0.0093 | 100 | 93 | 0.00 | 0.07 | 0.12 | 0.05 | 0.25 | 0.50 | Zhai et al. 2016 |
| *Chydorus sphaericus* | crustacean | NOEC | 5.64 | 1000 | 5640 | 0.00 | 0.07 | 0.12 | 0.05 | 0.25 | 0.50 | Ding et al. 2012 |
| *Cyprinus carpio* | fish | NOEC | 0.00095 | 100 | 9.50 | 0.00 | 0.07 | 0.12 | 0.05 | 0.25 | 0.50 | Inoue et al. 2012 |
| PFOS | *Moina macrocopa* | crustacean | LC50 | 17.95 | 1000 | 17950 | 0.98 | 0.70 | 2.55 | 2.30 | 2.51 | 1.79 | Ji et al. 2008 |
| *Moina micrura* | crustacean | LC50 | 0.5496 | 1000 | 549.60 | 0.98 | 0.70 | 2.55 | 2.30 | 2.51 | 1.79 | Boudreau et al. 2003 |
| *Daphnia magna* | crustacean | EC50 | 23.41 | 1000 | 23410 | 0.98 | 0.70 | 2.55 | 2.30 | 2.51 | 1.79 | Ji et al. 2008 |
| *Brachionus calyciflorus* | rotifer | LC50 | 61.80 | 1000 | 61800 | 0.98 | 0.70 | 2.55 | 2.30 | 2.51 | 1.79 | Zhang et al. 2014 |

Barmentlo, S.H.; Stel, J.M.; van Doorn, M.; Eschauzier, C.; de Voogt, P.; Kraak, M.H. Acute and chronic toxicity of short-chain perfluoroalkyl substances to *Daphnia magna*. Environmental Pollution (Environ. Pollut.) 198 (2015) 47–53. <https://doi.org/10.1016/j.envpol.2014.12.025>.

Boudreau, T.M. *Toxicity of perfluorinated organic acids to selected freshwater organisms under laboratory and field conditions*. The University of Guelph, 2002.

Boudreau, T.; Sibley, P.; Mabury, S.; et al. Laboratory evaluation of the toxicity of perfluorooctane sulfonate (PFOS) on *Selenastrum capricornutum*, *Chlorella vulgaris*, *Lemna gibba*, *Daphnia magna*, and *Daphnia pulicaria*. Archives of Environmental Contamination and Toxicology (Arch. Environ. Contam. Toxicol.) 44 (2003) 0307–0313. <https://doi.org/10.1007/s00244-002-2102-6>.

Ding, G.H.; Fromel, T.; van den Brandhof, E.; Baerselman, R.; Peijnenburg, W.J. Acute toxicity of poly- and perfluorinated compounds to two cladocerans, *Daphnia magna* and *Chydorus sphaericus*. Environmental Toxicology and Chemistry (Environ. Toxicol. Chem.) 31 (2012) 605–610. <https://doi.org/10.1002/etc.1713>.

Inoue, Y.; Hashizume, N.; Yakata, N.; Murakami, H.; Suzuki, Y.; Kikushima, E.; Otsuka, M. Unique physicochemical properties of perfluorinated compounds and their bioconcentration in common carp *Cyprinus carpio* L. Archives of Environmental Contamination and Toxicology (Arch. Environ. Contam. Toxicol.) 62 (2012) 672–680. <https://doi.org/10.1007/s00244-011-9730-7>.

Ji, K.; Kim, Y.; Oh, S.; Ahn, B.; Jo, H.; Choi, K. Toxicity of perfluorooctane sulfonic acid and perfluorooctanoic acid on freshwater macroinvertebrates (*Daphnia magna* and *Moina macrocopa*) and fish (*Oryzias latipes*). Environmental Toxicology and Chemistry (Environ. Toxicol. Chem.) 27(10) (2008) 2159–2168. <https://doi.org/10.1897/07-523.1>.

Li, M.H. Toxicity of perfluorooctane sulfonate and perfluorooctanoic acid to plants and aquatic invertebrates. Environmental Toxicology (Environ. Toxicol.) 24 (2009) 95–101. <https://doi.org/10.1002/tox.20396>.

Lu, G.-H.; Liu, J.-C.; Sun, L.-S.; Yuan, L.-J. Toxicity of perfluorononanoic acid and perfluorooctane sulfonate to *Daphnia magna*. Water Science and Engineering (Water Sci. Eng.) 8 (2015) 40–48. <https://doi.org/10.1016/j.wse.2015.01.001>.

Manera, M.; Giari, L.; Vincenzi, F.; Guerranti, C.; DePasquale, J.A.; Castaldelli, G. Texture analysis in liver of common carp (*Cyprinus carpio*) sub-chronically exposed to perfluorooctanoic acid. Ecological Indicators (Ecol. Indic.) 81 (2017) 54–64. <https://doi.org/10.1016/j.ecolind.2017.05.001>.

Razak, M.R.R.; Aris, A.Z.; Zainuddin, A.H.; Yusoff, F.M.; Yusof, Z.N.B.; Kim, S.D.; Kim, K.W. Acute toxicity and risk assessment of perfluorooctanoic acid (PFOA) and perfluorooctanesulfonate (PFOS) in tropical cladocerans *Moina micrura*. Chemosphere (Chemosphere) 313 (2023) 137377. <https://doi.org/10.1016/j.chemosphere.2022.137377>.

Sanderson, H.; Boudreau, T.M.; Mabury, S.A.; Solomon, K.R. Impact of perfluorooctanoic acid on the structure of the zooplankton community in indoor microcosms. Aquatic Toxicology (Aquat. Toxicol.) 62 (2003) 227–234. <https://doi.org/10.1016/S0166-445X(02)00100-5>.

Wang, Y.; Niu, J.; Zhang, L.; Shi, J. Toxicity assessment of perfluorinated carboxylic acids (PFCAs) towards the rotifer *Brachionus calyciflorus*. Science of the Sum Environment (Sci. Sum Environ.) 491–492 (2014) 266–270. <https://doi.org/10.1016/j.scitotenv.2014.02.028>.

Yang, S.; Xu, F.; Wu, F.; Wang, S.; Zheng, B. Development of PFOS and PFOA criteria for the protection of freshwater aquatic life in China. Science of the Sum Environment (Sci. Sum Environ.) 470–471 (2014) 677–683. <https://doi.org/10.1016/j.scitotenv.2013.09.094>.

Zhai, Y.; Xia, X.; Zhao, X.; Dong, H.; Zhu, B.; Xia, N.; Dong, J. Role of ingestion route in the perfluoroalkyl substance bioaccumulation by *Chironomus plumosus* larvae in sediments amended with carbonaceous materials. Journal of Hazardous Materials (J. Hazard. Mater.) 302 (2016) 404–414. <https://doi.org/10.1016/j.jhazmat.2015.10.008>.

Zhang, L.; Niu, J.; Li, Y.; Wang, Y.; Sun, D. Evaluating the sub-lethal toxicity of PFOS and PFOA using rotifer *Brachionus calyciflorus*. Environmental Pollution (Environ. Pollut.) 180 (2013) 34–40. <https://doi.org/10.1016/j.envpol.2013.04.031>.

Zhang, L.; Niu, J.; Wang, Y.; Shi, J.; Huang, Q. Chronic effects of PFOA and PFOS on sexual reproduction of freshwater rotifer *Brachionus calyciflorus*. Chemosphere (Chemosphere) 114 (2014) 114–120. <https://doi.org/10.1016/j.chemosphere.2014.03.099>.
